# Supplementary material for: Physiotherapy Post Lumbar Discectomy: Prospective Feasibility and Pilot Randomised Controlled Trial
Source: PLoS One. 2015 Nov 12;10(11):e0142013. doi: 10.1371/journal.pone.0142013 (PMC4642943; doi:10.1371/journal.pone.0142013)
Supplement: S1 Minimum data set — (XLSX) [file pone.0142013.s002.xlsx]

## Sheet: Baseline
Input QEHB or SRFT	Intervention 1=PL, 2=PL + physio	Input name of Assessor from box on Front page of Assessment	Assessment week: baseline = 0	input date of assessment dd/mm/yyyy	Score: Male = 1, or Female = 2	input date of birth dd/mm/yyyy		input date of operation dd/mm/yyyy	to convert months to weeks, 1 month = 4.33 weeks, x nos of months	score one of these values ticked =1 , if box unticked = 0	score one of these values ticked =1 , if box unticked = 0	score one of these values ticked =1 , if box unticked = 0	score one of these values ticked =1 , if box unticked = 0	score one of these values ticked =1 , if box unticked = 0	score one of these values ticked =1 , if box unticked = 0	score one of these values: planned = 1, or emergency = 2 or unticked = 0	Score 1 to 15 across boxes e.g. White British = 1, other mixed background = 15	Score: Employed =1, Self-Employed = 2, Housewife/Husband = 3, Unemployed = 4,Carer = 5, Retired = 6, Student = 7, Other = 8, unticked = 0	Input text as written on assessment	Score: less than £10,000 = 1; £10,000 - £19,999 = 2; £20,000 - £29,999 = 3; £30,000 - £39,999 = 4; £40,000 - £49,999 = 5; £50,000-£59,000 = 6, £60,000-£69,000 = 7, £70,000 or above = 8	score one of these values Yes =1, No or box unticked = 0.	score one of these values Yes =1, No or box unticked = 0.	score one of these values Yes =1, No or box unticked = 0.	Input post code as written on assessment	score one of these values Yes =1, No = 0.	Input text of name(s) of pain relief medicine written on assessment	ROLAND MORRIS DISABILITY QUESTIONNAIRE insert into each column SCORE: IF BOX TICKED = 1, IF BOX UNTICKED = 0
Site: QEHB or SRFT		Assessor	Assessment	Date of Assessment	Gender	Date of birth	Age	Date of your operation	Duration of symptoms prior to surgery (in months or weeks)	Nature of Symptoms prior to surgery : Leg pain	Nature of Symptoms prior to surgery : Back pain	Nature of Symptoms prior to surgery: Pins and needles	Nature of Symptoms prior to surgery: numbness	Nature of Symptoms prior to surgery : Weakness	Nature of Symptoms prior to surgery : Bladder and bowel dysfunction:	Was the surgery planned or emergency?	To which of these ethnic groups do you consider you belong?	What is your current work status	What is your current work status: Please detail	Please indicate which income band your approximate income would fall within:	Please choose a statement below that best describes your sick pay/benefits? Employer's sick pay	Please choose a statement below that best describes your sick pay/benefits? Statutory sick pay	Please choose a statement below that best describes your sick pay/benefits?Disability living allowance	What is your post code?	Are you currently taking any pain medication for your back problem on a regular basis? Yes or No	Are you currently taking any pain medication for your back problem on a regular basis? Name of Pain medication(s)	RMD1 I stay at home most of the time because of my back	RMD2 I change position frequently to try and get my back comfortable	RMD3 I walk more slowly than usual because of my back	RMD4 Because of my back I am not doing any of the jobs that I usually do around the house	RMD5 Because of my back, I use a handrail to get upstairs	RMD6 Because of my back, I lie down to rest more often	RMD7 Because of my back, I have to hold on to something to get out of an easy chair	RMD8 Because of my back, I try to get other people to do things for me	RMD9 I get dressed more slowly than usual because of my back	RMD10 I only stand for short periods of time because of my back	RMD11 Because of my back, I try not to bend or kneel down	RMD12 I find it difficult to get out of a chair because of my back	RMD13 My back is painful almost all of the time	RMD14 I find it difficult to turn over in bed because of my back	RMD15 My appetite is not very good because of my back pain	RMD16 I have trouble putting on my socks (or stockings) because of the pain in my back	RMD17 I only walk short distances because of my back	RMD18 I sleep less well because of my back	RMD19 Because of my back pain, I get dressed with help from someone else	RMD20 I sit down most of the day because of my back	RMD21 I avoid heavy jobs around the house because of my back	RMD22 Because of my back pain, I am more irritable and bad tempered with people than usual	RMD23 Because of my back, I go upstairs more slowly than usual
SRFT	2	Teresa Barrett	0	2013-02-19	1	1977-09-08	36	2013-01-16	155.88	1	1	0	1	1	0	1	1	1, 7	part time student	2	1	0	0	WN2 5HU	1	Paracetamol, Ibuprofen	1	1	1	1	1	1	1	1	1	1	1	1	0	1	0	0	0	1	0	1	1	0	1
SRFT	1	Ruth Battersby	0	2013-02-20	1	1971-06-11	42	2013-01-17	779.4	1	1	0	1	0	0	1	1	1		3	1	0	0	M23 0AA	1	Paracetamol, Tremadol	1	1	1	0	0	0	0	0	0	0	0	0	0	0	0	1	1	0	0	0	1	0	0
SRFT	2	Annalisa Newson	0	2013-02-20	2	1977-10-20	36	2013-01-17	103.92	1	1	0	1	0	0	1	1	2		2	0	0	0	OL4 2RE	1	Tramadol, Gabepentin, Amitryptyline	0	1	1	1	0	0	0	1	1	1	1	0	0	1	0	1	0	1	0	0	1	1	1
SRFT	1	Teresa Barrett	0	2013-02-26	1	1967-08-13	46	2013-01-22	30.31	1	1	0	1	0	0	1	1	2		5	0	1	0	M18 8WQ	0		1	1	1	1	1	0	1	0	1	1	0	1	1	0	0	1	0	1	0	0	0	0	1
SRFT	1	Annalisa Newson	0	2013-02-26	1	1979-03-20	44	2013-01-24	77.94	1	0	1	1	1	0	1	1	4			0	0	1	WA15 7LQ	1	Paracetamol, Ibuprofen	1	1	1	1	1	1	1	1	1	1	1	1	1	1	1	1	1	1	0	1	1	1	1
SRFT	2	Ruth Battersby	0	2013-02-27	2	1978-04-12	45	2013-01-23	25.98	1	1	1	0	1	0	1	1	1		3	1	0	0	CW11 1GH	1	Gabapentin 300 Mg, Paracetamol, Tramadol 50 mg, Amitriptyline 25 mg.	1	1	1	1	1	1	0	0	1	1	1	1	0	1	1	1	1	1	0	1	1	1	1
SRFT	2	Ruth Battersby	0	2013-02-27	1	1982-08-17	31	2013-01-24	34.64	1	0	1	1	1	0	1	1	1		3	1	0	0	0L8 4SH	0		0	0	0	1	0	0	0	0	1	0	1	0	0	1	0	0	0	0	0	0	1	1	0
SRFT	1	Rachel Carter	0	2013-02-27	1	1952-01-27	61	2013-01-24	51.96	1	0	0	0	0	0	1	1	2		3	0	0	0	WA16 6TT	1	Co Codamol, Naxproxen, Tramadol	1	1	1	1	0	1	1	1	1	1	1	0	0	1	0	1	1	1	0	1	1	1	1
SRFT	2	Rachel Carter	0	2013-02-27	2	1974-12-26	39	2013-01-24	38.97	1	1	1	1	0	0	1	4	8	My teaching contract is coming to an end due to illness		1	1	0	M32 0DA	1	Ibruprofen (as and when) Codeine for night	1	1	1	0	1	1	1	1	1	1	1	1	1	1	0	1	1	1	0	0	1	1	1
SRFT	2	Annalisa Newson	0	2013-03-12	1	1972-03-29	41	2013-02-05	21.65	1	1	0	0	1	0	1	1	2	man & van	3	0	0	0	M45 6DB	1	Tramadol, Diclofenac, Paracetamol	1	1	1	0	1	1	0	1	0	1	1	0	1	1	0	1	1	1	0	0	1	1	1
QEHB	2	Helen Chase	0	2013-03-20	2	1949-03-06	64	2013-02-14	77.94	1	1	0	0	1	0	1	1	6		2	0	0	0	WV11 1XL	1	Paracetamol	0	0	1	1	1	0	0	0	1	0	0	0	0	0	0	0	0	0	0	0	1	0	1
QEHB	1	Scott Brown	0	2013-03-20	1	1974-08-03	39	2013-02-21	77.94	1	1	0	0	0	0	1	1	1		3	1	0	0	B44 9QX	1	Tramacet	1	1	1	1	1	0	1	0	1	1	0	1	1	0	0	1	1	1	1	0	1	1	1
SRFT	2	Ruth Battersby	0	2013-03-20	2	1987-03-19	26	2013-02-18	30.31	1	1	1	0	0	0	1	1	4		1	0	1	0	M33 5JH	1	Pregabalin, Naproxen, Amitriptilne	1	1	0	1	0	1	0	0	0	0	1	0	0	0	0	0	0	1	0	0	1	0	0
QEHB	1	Soctt Brown	0	2013-04-03	1	1989-06-15	24	2013-03-04	90.93	1	1	1	1	0	0	1	1	1		1	0	1	0	B62 9DT	0		1	1	1	1	0	0	0	0	0	0	1	1	1	1	0	0	0	0		0	1	0	0
SRFT	1	Rachel Carter	0	2013-03-27	2	1974-11-26	39	2013-02-25	38.97	1	0	1	0	0	0	1	1	1		2	0	0	0	BL8 1TG	1	Paracetamol, Ibuprofen	0	1	0	0	0	0	0	0	1	0	1	0	0	0	0	1	0	0	0	0	1	0	0
SRFT	1	Annalisa Newson	0	2013-04-02	2	1947-03-06	66	2013-02-21	25.98	1	0	1	1	0	0	1	1	6			0	0	0	BL8 4BZ	1	Co-Codamol 30/500 mg 8 x day, Naproxen 500 mg 2 x day, Nortriptyline 10 mg 1 x night	1	1	0	0	0	1	0	0	1	1	0	0	1	1	0	1	0	1	0	0	1	0	0
SRFT	2	Annalisa Newson	0	2013-04-03	2	1961-12-27	52	2013-03-05	25.98	0	1	0	1	1	0	1	1	1		3	0	0	0	M30 8HQ	1	Paracetamol, Codeine, ibruprofen	0	1	0	1	0	1	0	0	1	1	0	0	0	0	0	1	1	0	0	0	1	0	0
QEHB	1	Helen Chase	0	2013-04-10	1	1980-08-30	33	2013-03-07	43.3	1	1	1	1	1	0	1	1	1		7	0	1	0	B94 5HS	0		0	1	0	1	0	1	0	0	0	0	0	0	0	1	0	1	0	0	0	0	1	1	0
QEHB	1	Helen Chase	0	2013-04-10	2	1951-06-21	62	2013-03-05	17.32	1	1	0	0	0	0	1	2	6		2	0	0	0	B11 3HL	0		0	1	0	1	0	0	0	0	1	0	0	0	0	0	0	1	0	0	0	0	1	0	0
SRFT	2	Annalisa Newson	0	2013-04-09	2	1970-11-29	43	2013-03-07	60.62	1	1	1	1	0	0	1	1	1		3	1	0	0	M40 1WJ	1	ibruprofen 400 mg as req, CoCodomol 30/500 as req, Pregabilin, 150 mg twice a day.	0	1	0	1	0	0	0	0	0	1	1	0	0	0	0	0	0	0	0	0	1	0	0
SRFT	1	Annalisa Newson	0	2013-04-10	2	1962-11-16	51	2013-03-08	34.64	1	0	1	1	0	0	1	1	1		6	1	0	0	OL12 7HD	0		0	1	1	0	0	1	0	0	1	0	0	0	0	0	0	0	0	1	0	0	1	0	1
QEHB	1	Helen Chase	0	2013-04-17	2	1978-08-03	35	2013-03-11	12.99	1	1	1	1	1	0	1	1	3			1	0	0	B26 2SW	1	Tramadol	0	0	1	1	0	1	1	0	1	1	1	0	0	0	0	0	1	1	0	0	1	0	1
QEHB	1	Helen Chase	0	2013-04-17	2	1959-12-30	54	2013-03-14	47.63	1	0	1	1	1	0	1	1	1		5	1	0	0	B36 9BP	0		0	1	1	0	0	1	0	0	0	1	1	0	0	0	0	0	1	0	0	0	1	0	0
SRFT	2	Annalisa Newson	0	2013-04-10	1	1968-10-09	45	2013-03-07	30.31	1	1	0	0	0	0	1	1	2		6	0	0	0	SK11 7AG	1	Nurofen Plus	0	1	0	0	0	1	0	0	1	1	0	0	0	0	0	0	0	0	0	0	1	0	0
SRFT	2	Teresa Barrett	0	2013-04-16	2	1976-01-25	37	2013-03-12	51.96	1	1	1	1	1	0	1	1	1		6	1	0	0	OL2 7PP		Paracetamol, Ibprofen, Codeine	0	1	1	0	1	1	0	0	1	1	0	1	0	1	0	0	0	1	0	0	1	0	0
SRFT	1	Annalisa Newson	0	2013-04-23	1	1950-09-20	64	2013-03-25	207.84	1	0	0	1	0	0	0	1	4			0	0	0	SR15106	1	Trapadol, Paracetamol	1	1	1	1	1	1	0	0	1	1	1	0	0	1	1	0	1	1	0	0	1	0	0
QEHB	2	Helen Chase	0	2013-04-24	1	1982-12-31	31	2013-03-21	43.3	1	1	1	1	1	0	1	4	1		2	0	0	0	B70 855	1	Gabapentin, Co-Codamol	1	1	1	1	1	1	0	0	1	0	1	1	0	1	0	1	1	0	0	1	1	0	1
QEHB	2	Scott Brown	0	2013-05-01	1	1976-03-01	37	2013-03-25	103.92	1	1	1	1	0	0	1	1	1		4	1	1	0	DY4 8HZ	0		0	0	0	0	0	0	0	0	1	0	0	0	0	0	0	0	0	0	0	0	0	0	0
QEHB	2	Scott Brown	0	2013-05-01	1	1962-12-06	51	2013-03-26	34.64	1	1	1	0	0	0	1	2	6		6	0	0	0	B97 4NN	0		0	0	0	0	0	0	0	0	0	0	0	0	0	0	0	0	0	0	0	0	0	0	0
QEHB	1	Helen Chase	0	2013-05-08	2	1950-03-05	63	2013-04-09	77.94	1	1	1	1	0	1	1	1	6		3	0	0	1	WS9 9JD	1	Tramadol 100 mgs bd	0	1	0	1	1	0	1	0	1	0	1	0	0	0	0	1	0	0	0	0	1	0	0
QEHB	2	Helen Chase	0	2013-05-15	2	1958-08-06	55	2013-04-14	8.66	1	1	0	1	0	1	2	1	2	Children's Social Care Consultant for local government	8	0	0	0	WR10 2PD	0		0	1	1	0	0	0	0	0	0	0	0	0	0	1	0	0	0	1	0	0	0	0	1
SRFT	1	Annalisa Newson	0	2013-05-22	2	1984-05-09	29	2013-04-19	51.96	1	1	1	1	1	0	1	12	1		5	1	0	0	M16 7DA	1	Gabapentin 200 mg TDS, Cocodamol 30/500, CoCodamol 8/500	0	1	0	1	0	0	1	0	0	0	1	0	0	1	0	1	0	1	0	0	1	1	0
QEHB	2	Scott Wymore - Brown	0	2013-06-19	2	1968-01-28	45	2013-05-22	21.65	1	1	1	1	0	1	2	1	1		4	1	0	0	B36 9LP	1	Paracetamol, Tramadol	1	1	1	1	1	1	1	1	1	1	1	1	1	1	1	1	1	1	1	1	1	1	1
QEHB	1	Scott Wymore - Brown	0	2013-06-19	1	1968-03-28	45	2013-05-21	25.98	1	0	0	0	0	1	2	1	1		6	0	0	0	B96 6HT	1	Co-Codamol 30/50, Pre-Gabelin, Tramadol	1	1	1	1	0	1	1	1	1	0	0	0	1	1	0	1	1	0	0	0	1	1	1
SRFT	2	Annalisa Newson	0	2013-06-25	1	1957-12-11	56	2013-06-03	103.92	1	1	1	0	0	1	1	1	2		4	0	0	0	CW8 2GB	1	Morphine patches currently 25 ml, was 75 then 50 now 25 ml.	1	1	1	0	1	1	0	1	1	0	0	0	0	0	1	0	1	1	0	1	1	1	1
QEHB	2	Helen Chase	0	2013-07-10	1	1966-12-21	48	2013-06-13	38.97	1	1	1	1	1	0	1	1	4		1	0	0	1	B27 7PA	1	Gabapentin 600 mg, Co-Codmal	0	1	1	1	1	1	1	0	1	1	1	1	0	1	0	1	1	1	0	0	1	1	1
SRFT	1	Annalisa Newson	0	2013-07-09	2	1983-08-08	30	2013-06-05	103.92	1	0	1	1	0	1	1	1	1	Home Support Worker	2	1	0	0	OL11 2RA	1	Ibuprofen, Tramadol	0	0	0	0	0	0	0	0	0	1	0	0	0	1	0	0	1	1	0	0	1	0	0
SRFT	2	Annalisa Newson	0	2013-07-10	2	1967-07-06	46	2013-05-24	30.31	1	1	0	1	1	0	1	1	1	Civil Servant		1	0	0	M28 7XE	1	Paracetamol	0	1	1	1	0	0	0	0	1	1	1	0	0	1	0	0	1	0	0	0	1	0	1
SRFT	1	Annalisa Newson	0	2013-07-16	2	1980-10-18	33	2013-06-13		1	1	0	0	0	0	1	1	1		6	1	0	0	SK8 3NF	0		0	1	1	0	0	1	0	0	1	0	0	0	0	1	0	1	0	0	0	1	1	0	1
QEHB	1	Helen Chase	0	2013-07-24	1	1968-09-05	45	2013-06-25	43.3	1	1	0	1	1	0	1	1	1		2	0	1	0	B24 0NT	1	Gabapentin, Codine	0	1	1	1	1	1	0	1	1	1	1	1	1	1	1	1	1	0	0	0	1	1	1
QEHB	1	Helen Chase	0	2013-08-07	1	1971-01-18	44	2013-06-28	0	1	0	0	0	0	0	2	2	1		2	1	0	0	B75 5TP	1	Paracetamol and Codeine	1	1	1	1	1		1	1	1	0	1	1	1	0	1	1	1	0	0	0	1	0	1
QEHB	2	Scott Luxmore Brown	0	2013-08-14	1	1962-02-12		2013-07-15	17.32	1	0	0	0	0	0	2		1		2	1	0	0	B74 3BE	1	Co-Codamol 500 mg	1	1	1	1	1	1	0	0	1	1	1	0	0	1	1	1	1	1	0	0	1	0	1
QEHB	2	Scott Luxmore Brown	0	2013-08-14	1	1980-12-17	33	2013-07-22	519.6	1	0	1	1	0	0	1	1	1		3	1	0	0	B43 5NF	1	Tramadol, Gabapentine	1	1	0	1	0	1	0	1	1	1	1	0	0	0	0	0	0	1	0	0	1	1	0
SRFT	1	Annalisa Newson	0	2013-08-13	2	1969-09-29	44	2013-07-03	103.92	0	0	0	0	0	1	1	1	1		4	1	0	0	SK15 2LH	0		0	0	1	0	0	0	0	0	0	0	0	0	0	0	0	0	0	0	0	0	1	0	0
SRFT	2	Annalisa Newson	0	2013-08-20	1	1957-09-16	57	2013-07-23	103.92	1	1	0	1	1	0	1	1	1	Telecomunication Engineer	4	1	0	0	WA15 7JF	1	Gabapentin 300 mg 2/day	1	1	1	1	0	1	0	0	0	0	1	0	0	0	0	0	1	0	0	0	1	0	0
SRFT	1	Annalisa Newson	0	2013-08-20	1	1979-05-02	34	2013-07-22		1	1	1	1	1	0	0	1	1	Removes slates from roofs	2	0	1	0	OL4 5NQ	1	Solphadol	1	1	1	1	1	0	1	1	1	1	1	1	0	1	0	1	1	1	1	1	1	0	1
SRFT	2	Annalisa Newson	0	2013-08-27	1	1960-02-25	53	2013-07-25	103.92	1	0	1	1	0	0	1	1	1	Office worker	3	0	1	0	WN3 6AQ	1	Paracetamol, Tramadol	0	1	1	0	0	0	0	0	0	0	0	0	0	1	0	1	0	1	0	0	1	0	0
SRFT	2	Annalisa Newson	0	2013-08-27	2	1951-03-06	62	2013-07-29	47.63	0	0	1	1	1	0	1	1	1	20 hours a week at a supermarket in admin	2	0	1	0	CW10 9EH	0	0	1	1	1	1	0	1	0	0	0	0	0	0	0	1	0	0	1	0	0	0	1	0	1
QEHB	2	Helen Chase	0	2013-08-28	1	1972-06-25	41	2013-08-01	25.98	1	1	1	1	1	1	1	1	2	retraining to be cabinet maker - medical retired from civil service	8	0	0	0	B32 1BG	1	Gabapentin - 1800 mg day, CoCodamol - 30 mg 3 x day, Diazapam - 2mg	1	1	1	1	0	1	1	1	1	0	1	1	1	1	0	1	1	1	0	0	1	1	1
SRFT	1		0	2013-09-10	2	1983-05-23	30	2013-08-08	103.92	1	1	1	1	0	0	1	1	2		4	0	1	0	OL8 1QJ	0		0	0	0	0	0	0	0	0	0	0	0	0	0	1	0	0	0	0	0	0	1	0	0
SRFT	1		0	2013-09-10	2	1963-10-31	50	2013-08-12	30.31	1	1	1	0	1	0	1	1	1	Parcel courier	2	1	0	0	M24 4EW	0		0	1	1	1	0	1	0	0	0	0	1	0	0	0	0	0	0	0	0	0	1	0	0
QEHB	1		0	2013-09-11	2	1971-09-13	42	2013-08-12	25.98	1	1	1	1	1	1	2	1	1	Cover supervisor in secondary school	4	1	0	0	B30 1AX	1	Pregabalin 75mg x 2, Amatryptalin 10mg, Ibuprofen 400mg, Paracetamol	0	1	1	1	1	0	1	0	1	0	0	1	1	1	0	1	0	1	1	0	1	1	1
SRFT	2		0	2013-09-17	1	1955-10-15	58	2013-08-20	25.98	1	0	0	1	0	0	1	1	2		5	0	0	0	SK11 6RN	1	Paracetamol	0	1	1	0	0	1	0	1	0	1	0	0	0	0	0	0	1	0	0	0	1	0	1
SRFT	1		0	2013-09-24	2	1963-07-19	50	2013-08-12	103.92	1	1	1	1	1	0	1	1	4	finished on grounds of medical	2	0	0	0	M33 5OY	1	Codeine, Naproxen, Gabapentin	0	1	1	0	1	1	0	0	1	1	0	0	0	0	0	1	0	1	0	0	1	1	1
SRFT	2		0	2013-09-25	1	1972-01-19	41	2013-08-21	34.64	1	0	1	1	1	0	1	1	1		2	1	1	0	M29 8WW	1	Paracetamol, Codeine Phosphate 30mg	0	1	0	0	0	1	1	0	0	0	0	0	0	0	0	0	0	0	0	0	0	1	0
QEHB	1		0		1	1957-09-10	47	2013-10-31	38.97	1	0	0	0	0	0	1	1	4		3	0	1	0	B68 9QN	1	Oprozanol, Naprosyn 500mg. Can't remember name of other	0	1	0	0	0	0	0	0	0	0	0	0	0	0	0	0	0	0	0	0	0	0	0
QEHB	1		0	2013-12-11	1	1969-03-04	45	2013-11-12	17.32	1	0	0	0	1	0	1	1	2	Electrician	2	0	0	0	B90 4HF	0		0	0	1	1	0	1	0	0	0	0	0	0	0	0	0	0	0	0	0	0	1	0	0
QEHB	2		0	2013-12-11	1	1976-08-13	38	2013-11-22	60.62	1	1	1	1	0	0	1	1	2		8	0	0	0	B91 3NU	0		1	1	0	1	0	1	0	0	1	0	0	1	0	0	0	1	0	0	0	0	1	0	0
QEHB	1		0	2013-12-13	2	1978-03-03	36	2013-11-11	3.24	1	0	1	1	0	0	1	1	1	Sister CDU, QEHB	3	1	0	0	B29 6SB	1	Paracetamol, Codeine, Tramadol, Oralmorphine	0	1	1	1	0	1	1	0	1	0	0	1	0	1	0	1	0	0	0	0	1	0	1
[truncated: 79 more columns]

## Sheet: Week 12
Input QEHB or SRFT	Intervmnetion 1: PL, 2 PL + Physio	Input name of Assessor from box on Front page of Assessment	Assessment week: 12 weeks post baseline = 12	input date of assessment dd/mm/yyyy	Administrator only; score for in-time 12 weeks = 1, or Late = 2	Administrator only; input date of due assessment dd/mm/yyyy if different from actual assessment date	Administrator only; Input number of weeks after 12 weeks if applicable, if not applicable and assessment on time score = 0	ROLAND MORRIS DISABILITY QUESTIONNAIRE insert into each column SCORE: IF BOX TICKED = 1, IF BOX UNTICKED = 0																									Score: completely recovered =1, much improved =2. slightly improved =3, not changed = 4, slightly worsened = 5, much worsened = 6, worse than ever = 7 , if no answer given = 0.	VISUAL ANALOGUE SCALE FOR PAIN (VASP) questions: Please take precise measurement (cms) with a ruler and input value to nearest millimetre (1 decimal place)						QUALITY OF LIFE EQ5D 5L questions score one of these values 1,2,3,4,5 from first to fifth item or X If no box is ticked					score number on scale least 0 and greatest 100	TAMPA Scale for Kinesiophobia questions score 1 of these values: strongly disagree = 1 , disagree = 2, agree = 3, strongly agree = 4, and if no number circled = 0. If 2 adjacent numbers are circled, enter mean of the 2 circled numbers.
Site: QEHB or SRFT		Assessor	Assessment	Date of actual "12" week Assessment	Assessment date check 12 weeks or Late	Due Date 12 Week Assessment	How many weeks late after 12 Week assessment due date	RMD1 I stay at home most of the time because of my back	RMD2 I change position frequently to try and get my back comfortable	RMD3 I walk more slowly than usual because of my back	RMD4 Because of my back I am not doing any of the jobs that I usually do around the house	RMD5 Because of my back, I use a handrail to get upstairs	RMD6 Because of my back, I lie down to rest more often	RMD7 Because of my back, I have to hold on to something to get out of an easy chair	RMD8 Because of my back, I try to get other people to do things for me	RMD9 I get dressed more slowly than usual because of my back	RMD10 I only stand for short periods of time because of my back	RMD11 Because of my back, I try not to bend or kneel down	RMD12 I find it difficult to get out of a chair because of my back	RMD13 My back is painful almost all of the time	RMD14 I find it difficult to turn over in bed because of my back	RMD15 My appetite is not very good because of my back pain	RMD16 I have trouble putting on my socks (or stockings) because of the pain in my back	RMD17 I only walk short distances because of my back	RMD18 I sleep less well because of my back	RMD19 Because of my back pain, I get dressed with help from someone else	RMD20 I sit down most of the day because of my back	RMD21 I avoid heavy jobs around the house because of my back	RMD22 Because of my back pain, I am more irritable and bad tempered with people than usual	RMD23 Because of my back, I go upstairs more slowly than usual	RMD24 I stay in bed most of the time because of my back		Global Perceived Effect: On a scale of 1-7 To what degree has your back problem changed compared to before your surgery?	VASP: Regarding Back Pain What is your level of back pain today (No Pain/Worse pain ever)	VASP: Regarding Back Pain: What has been the least level of your back pain over the past 2 weeks (No Pain/Worse pain ever)	VASP: Regarding Back Pain: What has been the greatest level of your back pain over the past 2 weeks (No Pain/Worse pain ever)	VASP: Regarding Leg Pain What is your level of leg pain today (No Pain/Worse pain ever)	VASP: Regarding Leg Pain What has been the least level of your leg pain over the past 2 weeks (No Pain/Worse pain ever)	VASP: Regarding Leg Pain What has been the greatest level of your leg pain over the past 2 weeks? (No Pain/Worse pain ever)	EQ5D 5L: Mobility: I have no problems in walking about = 1 , I have slight problems in walking about = 2, I have moderate problems in walking about = 3, I have severe problems in walking about = 4, I am unable to walk about = 5.	EQ5D 5L: Self-Care: I have no problems washing or dressing myself = 1, I have slight problems washing or dressing myself = 2, I have moderate problems dressing or washing myself = 3, I have severe problems washing or dressing myself = 4, I am unable to wash or dress myself = 5	EQ5D 5L: Usual Activities: I have no problems doing my usual activities = 1, I have slight problems doing my usual activities = 2, I have moderate problems doing my usual activities = 3, I have severe problems doing my usual activities = 4, I am unable to do my usual activities = 5.	EQ5D 5L: Pain/Discomfort: I have no pain or discomfort = 1, I have slight pain or discomfort = 2, I have moderate pain or discomfort = 3, I have severe pain or discomfort = 4, I have extreme pain or discomfort =5.	EQ5D 5L: Anxiety/Depression: I am not anxious or depressed = 1, I am slightly anxious or depressed = 2, I am moderately anxious or depressed = 3, I am severely anxious or depressed = 4, I am extremely anxious or depressed = 5.	EQ5D 5L: Your Health Today	TAMPA: 1. I am afraid that I might injure myself	TAMPA: 2. If I were to try to overcome it, my pain would increase	TAMPA: 3. My body is telling me I have something dangerously wrong	TAMPA: 4. My pain would probably be relieved if I were to exercise
SRFT	2	Annalisa Newson	12	2013-05-15				0	0	0	0	0	0	0	0	0	0	0	0	0	0	0	0	0	0	0	0	0	0		0	0	2	1	1	1.6	0	0.5	0.7	2	1	2	2	1	80	2	2	2	3
SRFT	2	Annalisa Newson	12	2013-05-14				0	1	0	0	0	0	0	0	0	1	0	0	0	0	0	1	0	0	0	0	0	1	1	0	5	2	2.9	2.7	4.2	0.5	0.4	1	1	1	2	2	2	60	3	2	2	3
SRFT	1	Annalisa Newson	12	2013-05-29				0	1	0	0	0	0	0	0	0	0	0	0	0	0	0	0	0	0	0	0	1	0	0	0	2	2	3.1	0.5	4.3	2.7	0.5	3.4	2	1	3	2	2	60	2	3	3	3
SRFT	2	Annalisa Newson	12	2013-05-22				0	1	1	0	0	1	1	0	0	1	1	0	1	0	0	0	0	1	0	0	1	1	0	0	10	3	4.1	2.4	6.3	4.2	3	7.3	3	1	4	3	3	85	3	3	3	3
QEHB	2	Helen Chase	12	2013-06-26	2	2013-06-12	2	0	0	0	0	1	0	0	0	0	0	0	0	0	0	0	0	0	0	0	0	0	0	0	0	1	2	0.7	0.6	1	0.6	0.5	0.5	1	1	3	2	1	94	2	2	1	3
SRFT	2	Annalisa Newson	12	2013-06-25	1	2013-06-25	0	0	1	0	0	0	0	0	0	0	1	0	0	0	0	0	0	0	0	0	0	1	0	0	0	3	2	2.1	0.8	3.5	0.3	0.3	1.8	1	1	1	2	1	85	2	2	1	3
QEHB	1	Helen Chase	12	2013-06-27	1	2013-06-27	0	0	1	0	0	0	0	0	0	0	0	0	0	0	0	0	0	0	0	0	0	0	0	0	0	1	2	1.6	2	2.2	1.2	2.2	2.1	1	1	2	2	1	95	3	2	2	3
SRFT	2	Teresa Barrett	12	2013-07-02	1	2013-07-02	0	0	1	0	0	0	0	0	0	0	0	0	0	0	0	0	0	0	0	0	0	0	0	0	0	1	2	1	0	3	0	0	3	1	1	2	2	1	95	1	1	1	4
QEHB	1	Helen Chase	12	2013-07-09	2	2013-07-02	1	0	1	0	0	0	0	0	0	1	0	0	0	0	1	0	1	0	0	0	0	1	0	0	0	5	2	0	0	2.2	4.1	0.7	5.8	3	1	1	3	1	55	3	3	3	2
SRFT	1	Teresa Barrett	12	2013-07-04	1	2013-07-04	0	0	1	0	0	0	0	0	0	0	0	1	0	0	0	0	0	0	1	0	0	1	0	0	0	4	2	0.4	0.3	1.4	0.4	0.4	1.2	1	1	2	2	1	85	3	2	2	3
SRFT	1	Annalisa Newson	12	2013-07-09	1	2013-07-17	1	0	1	1	0	0	0	0	0	1	0	0	0	0	0	0	1	0	0	0	0	1	0	0	0	5		1.1	1.3	3.6	0.5	0.9	3.5	1	1	1	2	2	80	1	2	1	3
QEHB	1	Scott Luxmore-Brown	12	2013-07-03	2	2013-06-12	3	1	1	1	1	0	0	0	1	1	0	1	0	0	0	0	1	0	1	0	0	1	1	1	0	12	3	2.3	0.9	5.8	0	0	0	2	2	3	2	3	70	4	3	3	3
QEHB	1	Scott Luxmore-Brown	12	2013-07-04	1	2013-07-03	0	0	1	0	1	0	0	1	1	0	0	1	0	1	0	0	0	0	1	0	0	1	0	0	0	8	4	6	3.3	7.6	5.1	2.6	8	2	1	3	3	3	70	4	3	3	2
QEHB	1	Helen Chase	12	2013-07-16	2	2013-07-10	1	0	0	0	0	0	0	0	0	0	0	0	0	0	0	0	0	0	0	0	0	1	0	0	0	1	2	0	0	0	0	0.2	0.2	1	1	2	1	1	98	3	2	1	3
QEHB	2	Helen Chase	12	2013-07-18	1	17.07.2013	0	1	1	1	0	0	1	0	0	0	0	0	0	0	0	0	1	0	0	0	0	1	0	0	0	6	2	2.6	2.5	5.9	2.5	2.4	5.9	2	1	2	2	2	70	2	1	2	3
SRFT	1	Annalisa Newson	12	2013-07-16				0	0	0	0	5	0	0	0	0	0	0	0	0	0	0	0	0	0	0	0	0	0	0	0	5	1	0	0	0	0	0	0.7	1	1	1	1	1	90	2	3	1	1
QEHB	2	Helen Chase	12	2013-07-25	1	2013-07-24	0	0	0	0	0	1	0	0	0	0	0	0	0	0	0	0	0	0	0	0	0	0	0	0	0	1	2	0.1	0.3	0.5	0	0.5	0.3	1	1	1	1	1	83	1	1	1	4
QEHB	1	Helen Chase	12	2013-08-01	1	2013-07-31	0	0	1	0	0	1	0	1	0	0	0	1	0	0	0	0	0	0	0	0	0	1	0	0	0	5	2	0	0	0	0	0	0	1	1	1	1	1	90	1	1	3	3
SRFT	2	Annalisa Newson	12	2013-08-06	2	2013-08-06	11	0	1	1	0	0	0	0	0	0	0	0	0	0	1	0	0	0	1	0	0	1	1	0	0	6	2	1.5	3.7	6.9	1.2	4.2	4.7	1	1	1	2	1	80	4	4	3	1
SRFT	1	Teresa Barrett	12	2013-08-22	2	2013-08-14	1	1	1	1	1	1	1	1	1	1	0	1	1	1	1	0	1	1	1	0	0	1	1	1	0	19	7	7.5	1.5	10	5.5	1.4	6.9	3	2	3	4	3	30	3	4	2	1
QEHB	2	Scott Luxmore-Brown	12	2013-09-12	1	2013-09-12	0	0	1	0	0	1	0	0	0	1	0	0	0	1	0	0	1	0	0	0	0	0	0	0	0	5	2	4	2	5.7	0	0	0	2	2	2	2	1	80	1	2	1	2
QEHB	1	Scott Luxmore-Brown	12	2013-09-12	1	2013-09-12		0	1	1	1	0	1	0	1	0	0	0	0	0	1	0	1	0	0	0	0	1	1	0	0	9	2	2.1	2.3	3.3	2.4	2.5	3.7	1	1	3	3	2	70	3	0	3	2
QEHB	1	Helen Chase	12	2013-10-24	1	2013-10-24		0	0	0	1	1	0	0	0	0	1	1	0	0	0	0	0	0	1	0	0	1	0	0	0	6	1	0.3	0.3	0.3	0.3	0.3	0.4	1	1	1	2	2	95	3	3	3	4
QEHB	2	Helen Chase	12	2013-10-03	1	2013-10-03		1	0	1	1	0	1	0	0	1	0	1	0	1	0	1	1	1	1	0	1	1	0	1	0	14	3	4.5	3.6	4.5	6.9	7.2	7.3	2	2	3	3	3	65	3	3	3	2
SRFT	2	Ruth Battersby	12	2013-10-02				0	1	1	0	0	0	0	0	1	1	1	0	0	1	0	0	1	1	0	0	1	0	1	0	10	2	0.1	0.1	2	0	1.2	1.6	2	2	3	2	2	90	3	3	3	2
SRFT	1	Scott Luxmore-Brown and Helen Chase	12	2013-10-31				0	0	0	0	0	0	0	0	0	0	0	0	0	0	0	0	0	0	0	0	0	0	0	0	0	1	0	0	0	0	0	0	1	1	1	1	1	90	1	1	1	4
QEHB	2	Helen Chase	12	2013-11-07				0	1	1	0	0	1	0	0	0	1	0	0	0	0	0	0	0	1	0	0	0	0	0	0	5		1	1	3.3	4.7	7.3	7.3	2	1	2	3	1	75	2	2	2	3
SRFT	2	Ruth Battersby	12	2013-11-13				0	1	0	0	1	0	1	0	0	0	0	0	0	1	0	0	0	0	0	0	0	0	1	0	5	3	2.1	0.6	5.3	0.35	0	1.6	1	1	2	2	1	80	3	3	2	2
QEHB	2	Helen Chase	12	2013-11-21				0	1	1	0	0	1	1	1	1	0	1	1	1	1	0	1	0	1	0	0	1	1	1	0	15	2	4.9	5	9.5	2.7	0.2	6.35	2	2	2	3	5	60	2	0	3	4
SRFT	1	Ruth Battersby	12	2014-01-16				0	1	0	0	0	0	0	0	0	0	0	0	0	1	0	0	0	0	0	0	0	0	0	0	2	2	0.5	0.4	2	0	0.1	0.2	2	1	2	2	1	90	2	2	1	3
SRFT	2	Ruth Battersby	12	2013-12-11				0	1	0	0	0	1	0	0	0	1	0	0	0	0	0	0	0	0	0	1	1	1	0	0	6	3	1.8	0.3	4.5	1.2	0.3	4.4	3	1	5	3	2	75	2	3	2	3
QEHB	1	Scott Luxmore-Brown	12	2014-02-20				0	0	0	0	0	0	0	0	0	0	0	0	0	0	0	0	0	0	0	0	0	0	0	0	0	2	0	0	0	0	0	0	1	1	2	1	1	95	1	1	1 & 4	1
QEHB	1	Helen Chase	12	2013-12-05				0	1	1	0	1	0	0	0	0	0	0	0	0	0	0	0	0	0	0	0	1	0	1	0	5	2	1.8	0	4	0.4	0	3.8	2	1	2	2	1	98	1	1	1	4
QEHB	2	Helen Chase	12	2014-04-03				0	1	0	0	0	0	0	0	0	0	0	0	0	0	0	0	0	0	0	0	0	0	0	0	1	2	0.3	0.3	0.5	3	0.8	4	1	1	1	2	1	70	2	2	1	2
QEHB	1	Helen Chase	12	2014-03-06				0	1	1	1	0	0	1	0	1	0	1	1	1	1	0	1	0	1	0	0	0	0	1	0	12	5	6.6	2.3	8.8	6.7	2.4	9.3	2	2	2	4	2	45	3	3	3	4
QEHB	1	Scott	12	2014-03-06				0	0	1	0	0	0	0	0	0	0	0	0	0	0	0	0	0	0	0	0	0	0	0	0	1	2	0.2	0.2	0.1	0.9	0.3	1	1	1	1	2	1	90	2	2	1	3
[truncated: 59 more columns]

## Sheet: Week 26
Input QEHB or SRFT	Intervention	Assessment week: 12 weeks post baseline = 12	ROLAND MORRIS DISABILITY QUESTIONNAIRE insert into each column SCORE: IF BOX TICKED = 1, IF BOX UNTICKED = 0																									Score: completely recovered =1, much improved =2. slightly improved =3, not changed = 4, slightly worsened = 5, much worsened = 6, worse than ever = 7 , if no answer given = 0.	VISUAL ANALOGUE SCALE FOR PAIN (VASP) questions: Please take precise measurement (cms) with a ruler and input value to nearest millimetre (1 decimal place)						QUALITY OF LIFE EQ5D 5L questions score one of these values 1,2,3,4,5 from first to fifth item or X If no box is ticked					score number on scale least 0 and greatest 100	TAMPA Scale for Kinesiophobia questions score 1 of these values: strongly disagree = 1 , disagree = 2, agree = 3, strongly agree = 4, and if no number circled = 0. If 2 adjacent numbers are circled, enter mean of the 2 circled numbers.
Site: QEHB or SRFT		Assessment	RMD1 I stay at home most of the time because of my back	RMD2 I change position frequently to try and get my back comfortable	RMD3 I walk more slowly than usual because of my back	RMD4 Because of my back I am not doing any of the jobs that I usually do around the house	RMD5 Because of my back, I use a handrail to get upstairs	RMD6 Because of my back, I lie down to rest more often	RMD7 Because of my back, I have to hold on to something to get out of an easy chair	RMD8 Because of my back, I try to get other people to do things for me	RMD9 I get dressed more slowly than usual because of my back	RMD10 I only stand for short periods of time because of my back	RMD11 Because of my back, I try not to bend or kneel down	RMD12 I find it difficult to get out of a chair because of my back	RMD13 My back is painful almost all of the time	RMD14 I find it difficult to turn over in bed because of my back	RMD15 My appetite is not very good because of my back pain	RMD16 I have trouble putting on my socks (or stockings) because of the pain in my back	RMD17 I only walk short distances because of my back	RMD18 I sleep less well because of my back	RMD19 Because of my back pain, I get dressed with help from someone else	RMD20 I sit down most of the day because of my back	RMD21 I avoid heavy jobs around the house because of my back	RMD22 Because of my back pain, I am more irritable and bad tempered with people than usual	RMD23 Because of my back, I go upstairs more slowly than usual	RMD24 I stay in bed most of the time because of my back		Global Perceived Effect: On a scale of 1-7 To what degree has your back problem changed compared to before your surgery?	VASP: Regarding Back Pain What is your level of back pain today (No Pain/Worse pain ever)	VASP: Regarding Back Pain: What has been the least level of your back pain over the past 2 weeks (No Pain/Worse pain ever)	VASP: Regarding Back Pain: What has been the greatest level of your back pain over the past 2 weeks (No Pain/Worse pain ever)	VASP: Regarding Leg Pain What is your level of leg pain today (No Pain/Worse pain ever)	VASP: Regarding Leg Pain What has been the least level of your leg pain over the past 2 weeks (No Pain/Worse pain ever)	VASP: Regarding Leg Pain What has been the greatest level of your leg pain over the past 2 weeks? (No Pain/Worse pain ever)	EQ5D 5L: Mobility: I have no problems in walking about = 1 , I have slight problems in walking about = 2, I have moderate problems in walking about = 3, I have severe problems in walking about = 4, I am unable to walk about = 5.	EQ5D 5L: Self-Care: I have no problems washing or dressing myself = 1, I have slight problems washing or dressing myself = 2, I have moderate problems dressing or washing myself = 3, I have severe problems washing or dressing myself = 4, I am unable to wash or dress myself = 5	EQ5D 5L: Usual Activities: I have no problems doing my usual activities = 1, I have slight problems doing my usual activities = 2, I have moderate problems doing my usual activities = 3, I have severe problems doing my usual activities = 4, I am unable to do my usual activities = 5.	EQ5D 5L: Pain/Discomfort: I have no pain or discomfort = 1, I have slight pain or discomfort = 2, I have moderate pain or discomfort = 3, I have severe pain or discomfort = 4, I have extreme pain or discomfort =5.	EQ5D 5L: Anxiety/Depression: I am not anxious or depressed = 1, I am slightly anxious or depressed = 2, I am moderately anxious or depressed = 3, I am severely anxious or depressed = 4, I am extremely anxious or depressed = 5.	EQ5D 5L: Your Health Today	TAMPA: 1. I am afraid that I might injure myself	TAMPA: 2. If I were to try to overcome it, my pain would increase	TAMPA: 3. My body is telling me I have something dangerously wrong	TAMPA: 4. My pain would probably be relieved if I were to exercise	TAMPA: 5. People aren't taking my medical condition seriously	TAMPA: 6. My accident has put my body at risk for the rest of my life	TAMPA: 7. Pain always means I have injured my body	TAMPA: 8. Just because something aggravates my pain does not mean it is dangerous	TAMPA:9. I am afraid that I might injure myself accidentally
SRFT	1	26	1	1	1	0	0	1	0	1	1	1	1	0	0	0	1	1	1	1	0	0	1	1	1	0	15	2	1.9	1.9	6	3	2.1	5.4	3	1	5	3	3	50	4	4	3	2	2	4	3	2	3
SRFT	2	26	0	1	0	0	0	0	0	0	0	0	1	0	0	1	0	1	0	1	0	0	1	1	0	0	7	2	3.3	1.9	4	2.1	1	3.3	1	1	2	2	2	71	2	3	2	4	2	2	3	3	3
QEHB	2	26	0	0	0	0	1	0	1	0	0	0	0	1	0	0	0	1	0	0	0	0	1	0	1	0	6	2	0.8	1.3	1.4	0.9	1.2	1.1	2	2	2	2	1	85	2	3	1	3	1	0	2	3	2
QEHB	1	26	0	1	1	0	1	1	1	0	1	1	1	0	1	1	0	1	1	1	0	0	1	1	1	0	16	3	2.9	8.9	9.4	0	0	0.1	3	3	3	3	2	65	3	3	3	3	3	3	3	2	3
QEHB	1	26	0	0	0	0	0	0	0	0	0	1	0	0	0	0	0	0	0	0	0	0	0	0	0	0	1	1	0	0	0	0	0	0	1	1	2	1	1	90	2	2	2	3	2	2	2	3	3
QEHB	2	26	1	1	1	1	1	1	1	1	1	0	1	1	1	0	1	1	0	0	0	0	1	0	0	0	15	3	1.7	0.7	8	1.4	0.7	5.4	2	3	2	3	2	70	2	3	3	4	2	3	3	2	3
SRFT	2	26	0	0	0	0	0	0	0	0	0	0	0	0	0	0	0	0	0	0	0	0	1	0	0	0	1	2	0.8	0.2	2	0.2	0.1	1.2	1	1	2	2	1	85	2	2	2	3	2	2	3	2	2
SRFT	2	26	0	0	0	0	0	0	0	0	0	0	0	0	0	0	0	0	0	0	0	0	0	0	0	0	0	2	0	0	0.5	0	1.2	1	1	1	2	1	1	60	3	3	2	3	4	3	3	3	3
QEHB	1	26	0	0	0	0	0	0	0	0	0	0	0	0	0	0	0	0	0	0	0	0	0	0	0	0	0	1	0	0.5	0.5	0.4	0.4	0.5	1	1	1	2	2	90	2	2	3	3	3	2	2	3	3
QEHB	2	26	0	1	1	0	1	1	0	0	0	1	0	0	1	1	0	1	0	1	0	0	1	0	1	0	11	2	2.4	2.2	2	6.1	6	6.1	2	1	2	2	1	80	2	2	3	3	4	4	4	3	2
QEHB	1	26	0	0	0	0	1	0	0	0	0	0	0	0	0	0	0	0	0	1	0	0	0	0	0	0	2	1	0	0	0.9	0	0	0.6	1	1	1	1	1	100	1	1	1	4	1	1	1	4	1
SRFT	2	26	0	1	0	0	0	0	0	0	0	0	0	0	0	0	0	0	0	0	0	0	0	1	0	0	2	1	0.5	0.2	1.5	0	0	0	1	1	1	2	1	90	1	3	2	3	2	1 & 3		3	2
QEHB	1	26	0	0	0	0	0	0	0	0	0	0	0	0	0	0	0	0	0	0	0	0	0	0	0	0	0	2	0	0	0	0	0	0	1	1	1	1	1	95	1	1	2	4	1	1		4	1
QEHB	2	26	0	0	0	0	0	0	0	0	0	0	0	0	0	0	0	0	0	0	0	0	0	0	0	0	0	2	0.5	0	1.5	3.4	0.8	3.2	1	1	1	2	1	87	1	2	1	3	1	3	2	3	3
QEHB	1	26	0	1	1	0	0	0	1	0	1	0	0	0	0	0	0	1	0	1	0	0	0	0	0	0	6	3	2.9	2.9	6.9	0.9	1	4.7	2	1	2	2	1	55	2	3	2	4	4	4	2	3	4
[truncated: 54 more columns]
